# Supplementary material for: Electromagnetic field-assisted cell-laden 3D printed poloxamer-407 hydrogel for enhanced osteogenesis
Source: Royal Society of Chemistry journal article supplement (doi:10.1039/d1ra01143j), 2021-01-01
Supplement: d1ra01143j1.pdf [file d1ra01143j1.pdf]

## Electronic Supplementary Information (ESI):

### Electromagnetic Fields-assisted Cell-laden 3D Printed Poloxamer-407 Hydrogel for Enhanced Osteogenesis

Sayan Deb Dutta, Jin Bin, Keya Ganguly, Dinesh K. Patel, and Ki-Taek Lim

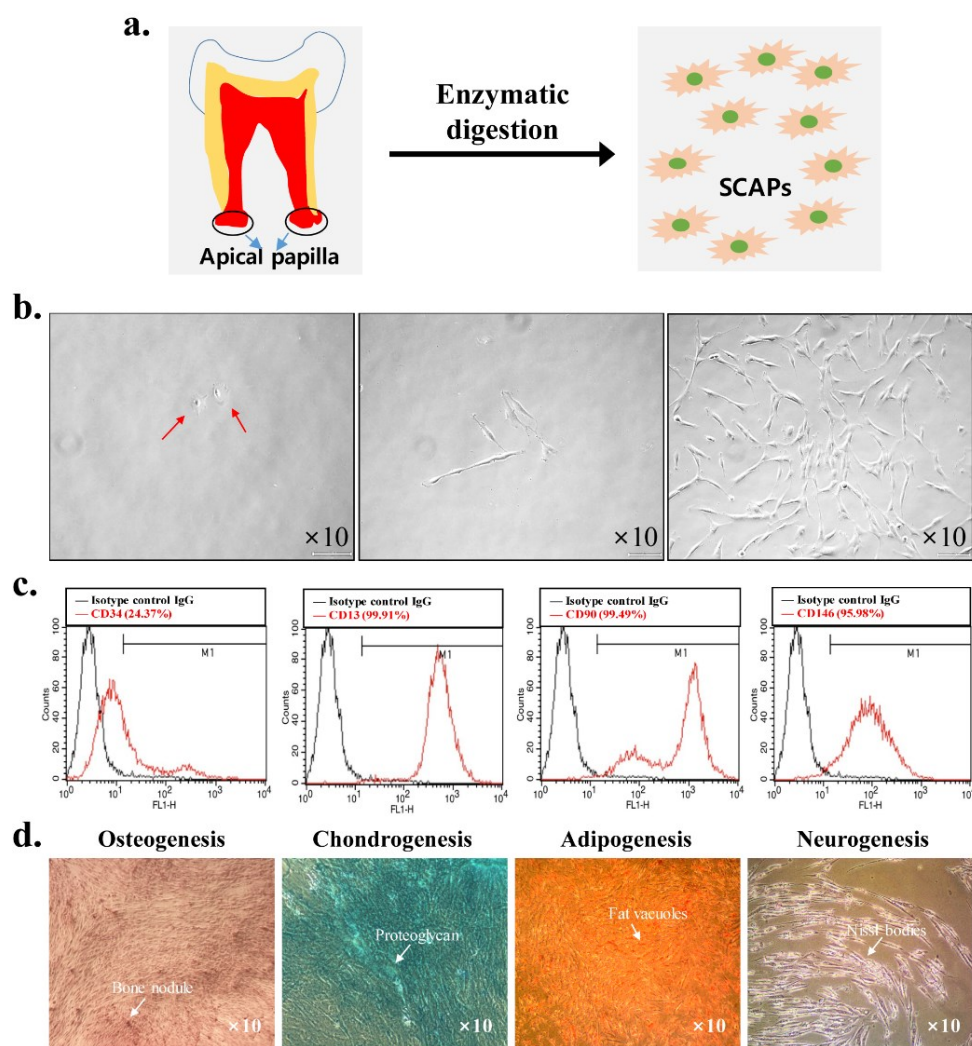

**Fig. S1.** Isolation and characterization of stem cells from apical papilla (SCAPs). **(a)** Schematic presentation of SCAPs isolation from human molar tooth, **(b)** The primary culture of SCAPs at indicated time interval (magnification  $\times 10$ ), **(c)** Flow cytometry analysis of SCAPs, and **(d)** The multilineage differentiation potential of SCAPs after 21 days of culture under different induction media (magnification  $\times 10$ ).

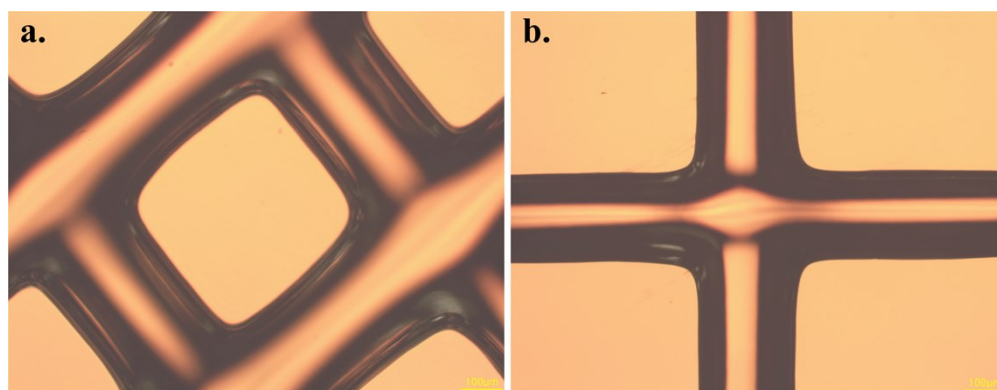

**Fig. S2.** Optical micrographs of the (a) pore geometry, (b) cross-connecting strand at a printing speed of  $5 \text{ mm s}^{-1}$ . Scale bar:  $100 \mu\text{m}$ .

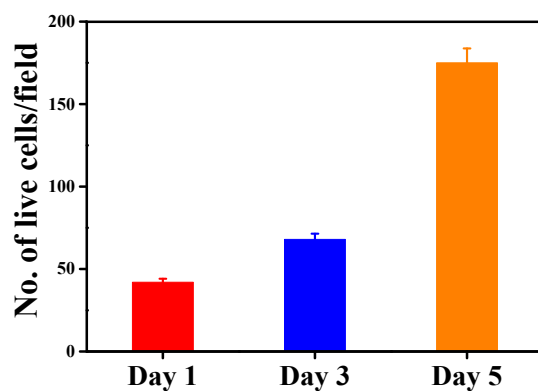

**Fig. S3.** Quantification of Live/Dead assay at indicated time intervals.

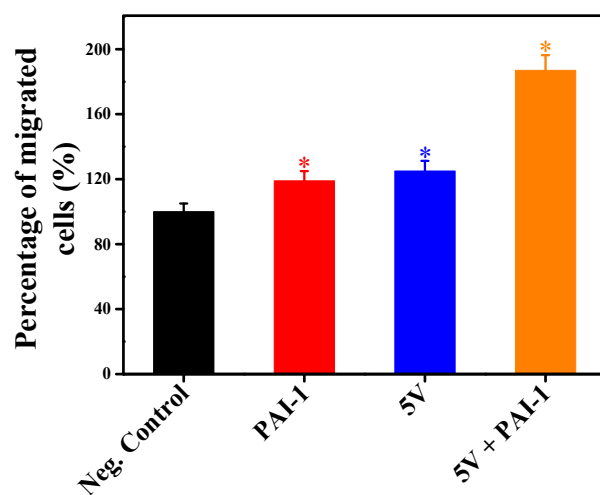

**Fig. S4.** Quantification of transwell cell migration assay after 12h. Data are mean  $\pm$  SD of triplicated experiments, statistical significance at  $*p < 0.05$ .
